# Supplementary material
Source: PubMed Central journal article supplement (PMC11029769)
Supplement: 262_2011_1183_MOESM1_ESM.pdf [file 262_2011_1183_MOESM1_ESM.pdf]

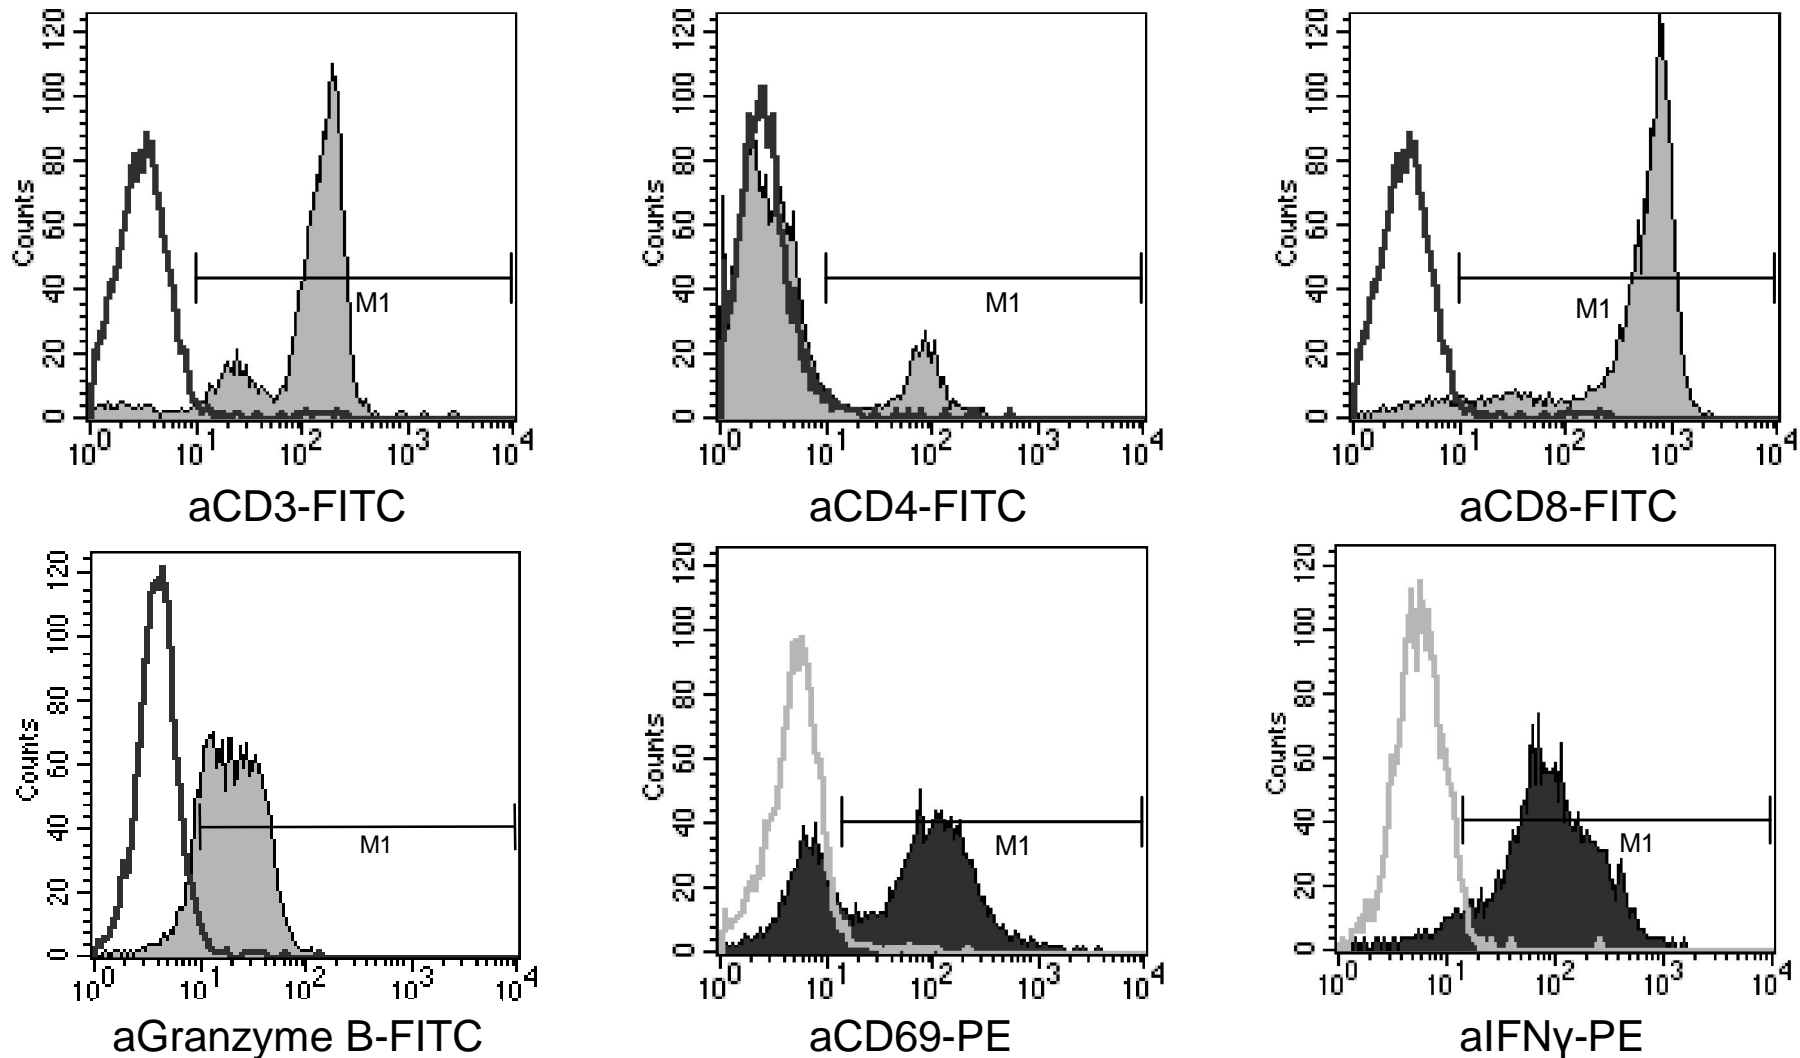

### Supplementary Figure: **Phenotypic analysis of RVP-stimulated T cells**

Flow cytometric analysis of RVP stimulated T cells was performed on day 77. Outgrowing cells expressed the pan T cell marker CD3. The majority of cells expressed the CTL marker CD8 and a minor population was positive for CD4. Most cells expressed the activation marker CD69. High levels of Granzyme B and IFN $\gamma$  were detected and support the CTL character of the analyzed cells.
